# Supplementary material
Source: publisher figshare collection journal article supplement (https://gsapubs.figshare.com/ndownloader/files/23294588)
Supplement: Supplementary file 1 [file 23294588]

PLATE 1. GEOLOGIC MAP OF NEOGENE FEATURES  
AND DEPOSITS OF THE COASTAL PLAIN  
IN THE SOUTHEASTERN UNITED STATES

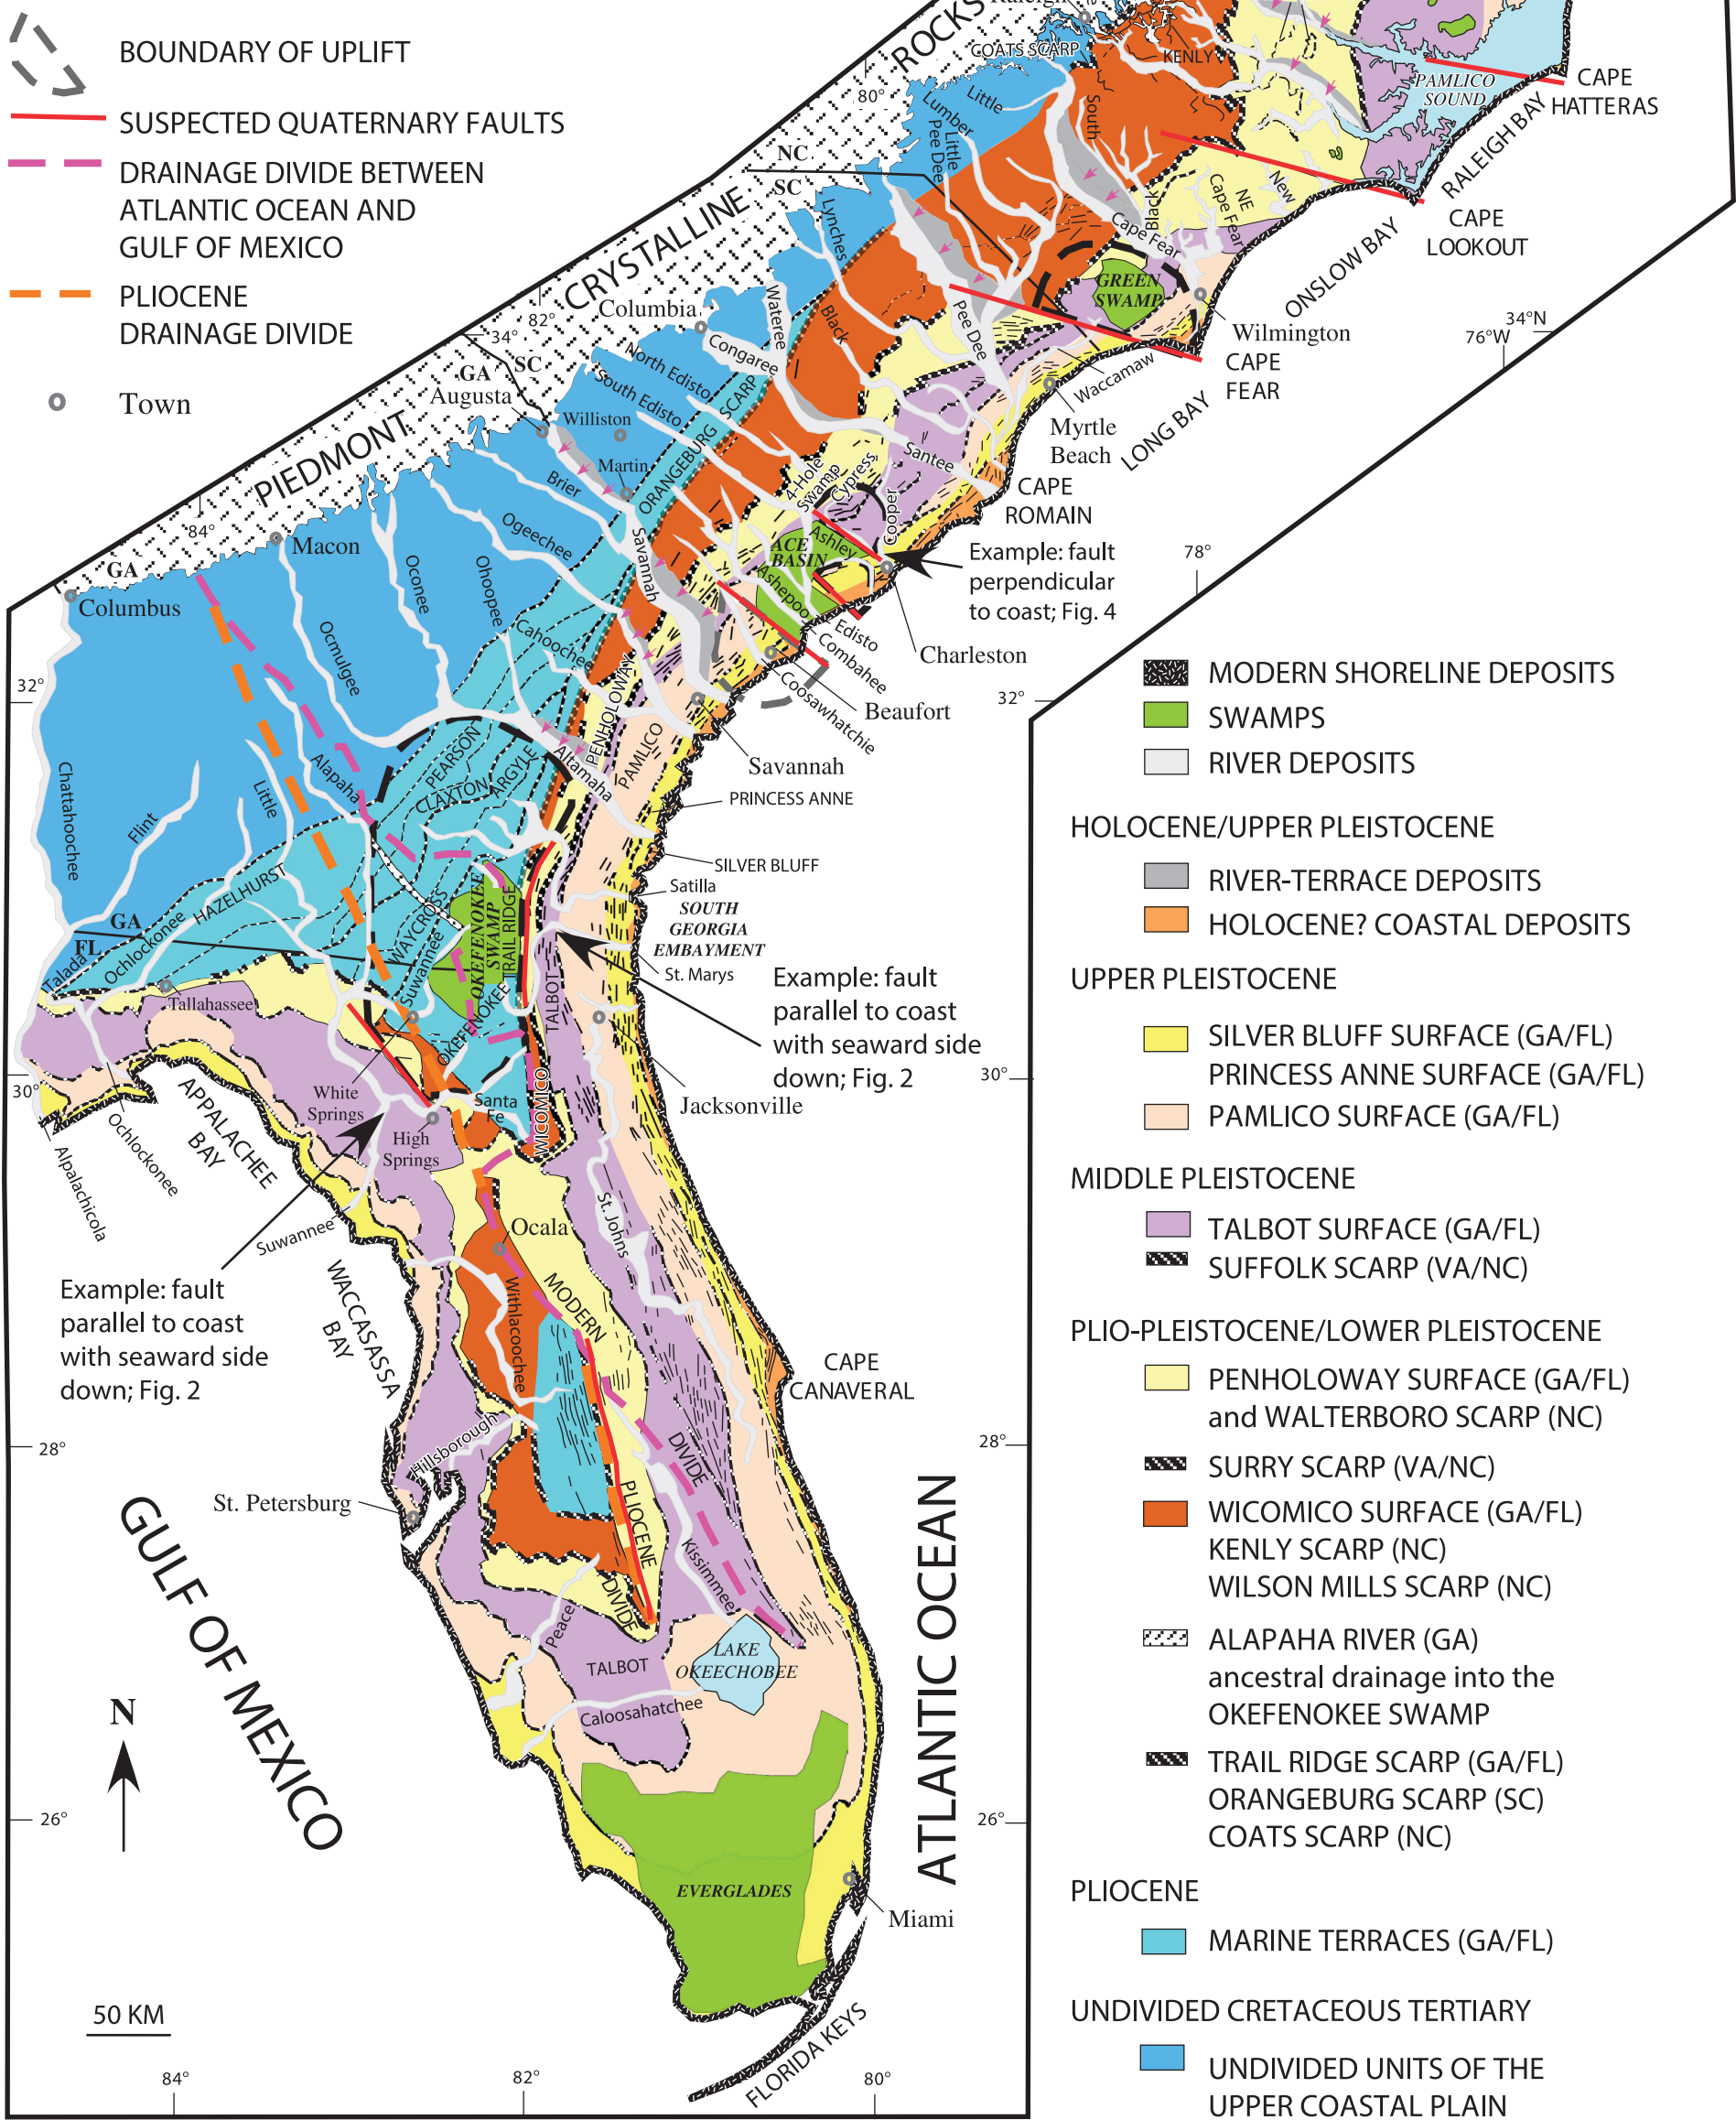

Geological Society of America Special Paper 493  
*Recent Advances in North American Paleoseismology and Neotectonics East of the Rockies*  
Edited by Randel Tom Cox, Martitia P. Tuttle, Oliver S. Boyd, and Jacques Locat

From Chapter 2, "Pleistocene shorelines and coastal rivers: Sensitive potential indicators of Quaternary tectonism along the Atlantic Coastal Plain of North America," by Mervin J. Bartholomew and Fredrick J. Rich

© 2012 The Geological Society of America  
Printed in the USA

Plate 1. Map of Pliocene and Quaternary coastal features of the Lower Atlantic Coastal Plain adapted from Abbott et al. (2011), Colquhoun (1969), Colquhoun et al. (1987), Daniels et al. (1983), Daniels and Kane (2001), DuBar et al. (1974), Farrell et al. (2003), Healy (1975), Hoyt and Hails (1974), Huddlestun (1988), MacNeil (1949), McCartan et al. (1984), Mixon et al. (1989), Owens (1989), Pirkle et al. (1991), White (1966), Willoughby et al. (1999), and Winker and Howard (1977), based in part on ages from Booth and Rich (1998), Booth et al. (1999), Cohen et al. (1984), Emslie et al. (1996), Grimm et al. (1993), Hansen et al. (2001), Hoyt et al. (1968), Ivester et al. (2001), Rich et al. (2000), Watts (1969), York et al. (1989), and Zayac et al. (2001), and paleoliquefaction sites from Amick et al. (1990), Dutton (1889), Obermeier et al. (1987), and Obermeier (1996). Small arrows show the lateral direction of river migration during incision as indicated by terraces. Small black bars indicate beach ridges, dunes, or other small, linear coastal features delineated on published maps. FL—Florida; GA—Georgia; NC—North Carolina; SC—South Carolina; VA—Virginia.
